# Supplementary material for: Lactobacillus plantarum Strains Can Enhance Human Mucosal and Systemic Immunity and Prevent Non-steroidal Anti-inflammatory Drug Induced Reduction in T Regulatory Cells
Source: PubMed Central journal article supplement (PMC5572349; doi:10.3389/fimmu.2017.01000), 2017-08-23
Supplement: Data_Sheet_1.pdf [file Data_Sheet_1.pdf]

**Table S1.** Antibodies used for flow cytometry

| <b>Specificity</b> | <b>Clone Name</b> | <b>Fluorochrome</b>         | <b>Supplier</b> |
|--------------------|-------------------|-----------------------------|-----------------|
| CD3                | UCHT1             | Pacific Blue                | BD Pharmingen   |
| CD8                | SK1               | PerCP                       | BioLegend       |
| CD69               | FN50              | PE-Cy7                      | BD Pharmingen   |
| FoxP3              | 206D              | APC                         | eBioscience     |
| CD45RO             | UCHL1             | Biotin + streptavidin PerCP | BioLegend       |
| IL4                | MP4-25D2          | PE-Cy7                      | BioLegend       |
| IL-17A             | eBio64DEC17       | Alexa488                    | eBioscience     |
| IL-21              | eBio3A3-N2        | PE                          | eBioscience     |
| IFN $\gamma$       | B27               | Alexa700                    | BD Pharmingen   |
| CD56               | MEM-188           | APC                         | eBioscience     |
| CD16               | CB16              | EFluor450                   | eBioscience     |
| CD335              | 9E2               | PE                          | BioLegend       |
| CD161              | HP-3G10           | PE-Cy7                      | eBioscience     |

**Table S2.** ORFs in prophage regions of *L. plantarum* TIFN101, *L. plantarum* CIP104448 (CIP48), and *L. plantarum* WCFS1 (WCFS1).

| <b>Prophage region</b> | <b>TIFN101</b> | <b>CIP48</b> | <b>WCFS1</b> | <b>Gene regions in WCFS1</b> |
|------------------------|----------------|--------------|--------------|------------------------------|
| I                      | 0              | 46           | 61           | lp_0624-0687                 |
| II                     | 51             | 0            | 0            | between lp_1162 and lp_1163  |
| III                    | 0              | 44           | 0            | between lp_1363 and lp_1364  |
| IV                     | 70             | 17           | 74           | lp_2399 -2480                |
| V                      | 4              | 0            | 0            | between lp_2509-2512         |
| VI                     | 13             | 0            | 15           | lp_3375-3391                 |
| <b>Total genes</b>     | <b>138</b>     | <b>107</b>   | <b>150</b>   |                              |

**Table S3.** Summary of main unique contigs/gene clusters/genes in *L. plantarum* TIFN101

| OGs                         | Contains functions                                                                 | Comment                                       |
|-----------------------------|------------------------------------------------------------------------------------|-----------------------------------------------|
| <b>Chromosome</b>           |                                                                                    |                                               |
| 185-187                     | Fumarate reductase/succinate dehydrogenase flavoprotein;<br>MFS family transporter |                                               |
| 382-383                     | Toxin-antitoxin system MazE/MazF family                                            | 100% id to plantarum UCMA3037                 |
| 409-411                     | Ankyrin repeat protein                                                             | Also in most plantarum genomes                |
| 461-463                     | Nitrate/sulfonate/bicarbonate ABC transporter                                      | Also in most plantarum genomes                |
| 1197                        | ADP-ribosylglycohydrolase                                                          | Also in plantarum UCMA3037 and ZJ316          |
| 1986                        | Abortive infection bacteriophage resistance protein                                |                                               |
| 2366                        | Glycosyl hydrolase family 25                                                       |                                               |
| 2549                        | Membrane proteinase PrsW, regulator of anti-sigma factor                           | Not in other plantarum genomes                |
| 2583                        | Hypothetical membrane protein, YfhO family                                         |                                               |
| 2610-2615                   | Fructose-specific PTS system                                                       | Also in most plantarum genomes                |
| <b>On putative plasmids</b> |                                                                                    |                                               |
| 3299-3308                   | Ribonucleotide reductase (aerobic); several transporters                           | 99% id to plasmid pST-III of plantarum ST-III |
| 3309-3322                   | EPS biosynthesis                                                                   | Between transposases; could be on chromosome  |
| 3323-3327                   | Mannose-6-phosphate isomerase; glutamine synthetase                                |                                               |
| 3328-3334                   | toxin-antitoxin system MazE/MazF family; cold shock protein                        | 99% id to plasmid p256 of plantarum NC7       |
| 3335-3347                   | Toxin-antitoxin system, RelE/StbE family; replication protein RepA                 | Definitely a plasmid                          |
| 3348-3353                   | Pyridine nucleotide-disulfide oxidoreductase                                       | 99% id to plantarum UCMA3037                  |
| 3354-3359                   | Oxalate:Formate antiporter; Excinuclease ABC subunit A paralog                     |                                               |
| 3360-3365                   | Peptidase E; alkaline shock protein                                                |                                               |
| 3366-3371                   | Plasmid partitioning ATPase ParA; replication protein                              | Definitely a plasmid                          |

**Table S4.** Summary of main unique contigs/gene clusters/genes in *L. plantarum* CIP104448

| OGs                         | Contains functions                                                                                                                                                     | Comment                                                                |
|-----------------------------|------------------------------------------------------------------------------------------------------------------------------------------------------------------------|------------------------------------------------------------------------|
| <b>Chromosome</b>           |                                                                                                                                                                        |                                                                        |
| 228-229                     | N-acetylmuramoyl-L-alanine amidase                                                                                                                                     |                                                                        |
| 293-297                     | Methionine ABC transporter                                                                                                                                             |                                                                        |
| 762-766                     | Cell surface protein precursor, with SEC10/PgrA surface exclusion domain and LPXTG-motif cell-wall anchor                                                              | Also in plantarum ST-III                                               |
| 1073-1076                   | Esterase/lipase; transporter; regulators                                                                                                                               | Also in plantarum ZJ316 and JDM1                                       |
| 2328                        | Cell surface-exposed lipoprotein (phage super infection exclusion)                                                                                                     |                                                                        |
| 2509-2519                   | Toxin-antitoxin system, RelE/RelF family; beta-glucosides PTS system; lactococcin A immunity protein; glycosyl hydrolase family 25; carboxymuconolactone decarboxylase | Also in most other plantarum genomes; also found on plantarum plasmids |
| 2861-2862                   | Polysaccharide deacetylase, intercellular adhesion protein IcaB; N-glycosyltransferase, intercellular adhesion protein IcaA                                            | No hits better than 40% id in NCBI                                     |
| <b>On putative plasmids</b> |                                                                                                                                                                        |                                                                        |
| 3093-3098                   | Lantibiotic biosynthesis                                                                                                                                               | Most similar to <i>Pediococcus clausenii</i> ATCC BAA-344              |
| 3099-3107                   | ATP-dependent endonuclease and DNA helicase; oligopeptidase F; transporters                                                                                            |                                                                        |
| 3108-3117                   | Type I RM system; DNA helicase                                                                                                                                         |                                                                        |
| 3118                        | Cell surface protein precursor                                                                                                                                         | 94% id to <i>Lactobacillus fermentum</i> 28-3-CHN                      |
| 3119-3126                   | D-Lactate dehydrogenase; glycogen biosynthesis                                                                                                                         |                                                                        |
| 3127-3134                   | Type I RM system;                                                                                                                                                      |                                                                        |
| 3135-3148                   | Toxin-antitoxin system; Polysaccharide deacetylase; mobilization proteins; replication protein; cation-transporting ATPase                                             | definitely on a plasmid                                                |
| 3149-3159                   | Replication protein RepA; plasmid partitioning ATPase; MFS family transporter                                                                                          | definitely on a plasmid                                                |
| 3160-3165                   | Amino acid transporters                                                                                                                                                | 99% id to plantarum UCMA3037                                           |
| 3168-3175                   | Fumarate reductase flavoprotein; cation transporter                                                                                                                    |                                                                        |
| 3176-3184                   | Oxalate:Formate Antiporter; Nicotinamidase - Nicotinate phosphoribosyltransferase - transcriptional regulator NrtR                                                     |                                                                        |
| 3185-3189                   | Glycosyltransferase                                                                                                                                                    |                                                                        |
| 3190-3193                   | Cell-envelope associated proteinase PrtR                                                                                                                               | 95% id to <i>Enterococcus</i> sp. GMD4E                                |

|           |                                                                                                                            |                                                           |
|-----------|----------------------------------------------------------------------------------------------------------------------------|-----------------------------------------------------------|
| 3194-3199 | Ferrochelatase; transporters                                                                                               | 99% id to plantarum UCMA3037                              |
| 3200-3205 | Cysteine desulfurase NifS; Quinolate synthetase; L-aspartate oxidase                                                       | Highest % id to <i>Lactobacillus parafarraginis</i> F0439 |
| 3206-3211 | Heavy metal transporting ATPase                                                                                            |                                                           |
| 3216-3218 | Glycosyl hydrolase family 70                                                                                               |                                                           |
| 3219-3220 | Peptidoglycan hydrolase, GH25 family                                                                                       |                                                           |
| 3224-3227 | Abortive infection phage resistance protein; toxin-antitoxin system, MazE/MazF family                                      |                                                           |
| 3228-3232 | Pyridine nucleotide-disulphide oxidoreductase; mobilization protein; cell-surface collagen-binding protein, LPXTG anchored |                                                           |
| 3235-3236 | Toxin-antitoxin system, MazE/MazF family                                                                                   | 100% id to p256 of <i>L.plantarum</i> NC7                 |
| 3246-3250 | Plasmid partition protein ParA, ATPase; replication protein; amino acid transporter                                        | Definitely on a plasmid                                   |
| 3251-3252 | C-terminal processing peptidase                                                                                            |                                                           |

**Table S5.** Summary of main contigs/gene clusters/genes absent only in *L. plantarum* TIFN101

| OGs                         | Contains functions                                                                                | Comment                                           |
|-----------------------------|---------------------------------------------------------------------------------------------------|---------------------------------------------------|
| <b>Chromosome</b>           |                                                                                                   |                                                   |
| 384-387                     | Beta-glucosides PTS system                                                                        |                                                   |
| 735-737                     | Beta-glucosides PTS system                                                                        |                                                   |
| 1218-1242.6                 | Iron chelatin ABC transporter; nitrate reductase and molybdenum cofactor biosynthesis             | Whole cluster absent for nitrate assimilation     |
| 2331-2332                   | Prolyl aminopeptidase; proline-containing amino acid or peptide transporter                       |                                                   |
| 2391-2393                   | Manganese transport protein MntH                                                                  | Mn transporter is present on a plasmid in TIFN101 |
| 2477-2483                   | Oxidoreductases; regulators                                                                       |                                                   |
| 2501-2506                   | Elongation factor LepA; Na(+)/H(+) antiporter; fumarate reductase; regulators                     |                                                   |
| 2530-2537                   | Glutamine amidotransferase; oxidoreductase; malate dehydrogenase; muramidase                      |                                                   |
| 2811-2816                   | Shikimate metabolism                                                                              |                                                   |
| 2822-2827                   | Beta-glucosides PTS system; N-acetylmuramic acid-6-phosphate etherase; N-acetylglucosamine kinase |                                                   |
|                             |                                                                                                   |                                                   |
| <b>On putative plasmids</b> |                                                                                                   |                                                   |
| 3025-3030                   | Arsenic resistance                                                                                | On plasmid pWCFS103                               |
| 3038-3055                   | Conjugation                                                                                       | On plasmid pWCFS103                               |

**Table S6:** Summary of main contigs/gene clusters/genes absent only in *L. plantarum* CIP104448

| OGs               | Contains functions                                                                   | Comment                                                   |
|-------------------|--------------------------------------------------------------------------------------|-----------------------------------------------------------|
| <b>Chromosome</b> |                                                                                      |                                                           |
| 328               | Extracellular protein, lysine-rich                                                   |                                                           |
| 334-348           | Transporters; regulators; hydrolases; many hypotheticals                             |                                                           |
| 362-375           | Plantaricin biosynthesis                                                             | CIP48 lacks the entire plantaricin gene cluster           |
| 991-995           | Exopolysaccharide biosynthesis                                                       | CIP48 lacks the entire cps-cps2-cps3 biosynthesis cluster |
| 1153-1158         | Beta-glucosides PTS system                                                           |                                                           |
| 2847-2854         | Transaldolase, transketolase; PTS system (mannitol ?)                                |                                                           |
| 2870-2878         | Lipase/esterase; Na(+)/H(+) antiporter; N-acetylneuraminate transport and metabolism |                                                           |
| 2896-2898         | Pyruvate oxidases                                                                    |                                                           |
| 2954-2958         | PTS system, glucitol/sorbitol-specific                                               |                                                           |

**Table S7A.** Summary of main novel contigs/gene clusters/genes present in *L. plantarum* CIP104448 and *L. plantarum* TIFN101, but absent in *L. plantarum* WCFS1.

| OGs                         | Contains functions                                                                                          | Comment                                                                                                  |
|-----------------------------|-------------------------------------------------------------------------------------------------------------|----------------------------------------------------------------------------------------------------------|
| <b>Chromosome</b>           |                                                                                                             |                                                                                                          |
| 150                         | Alpha-galactosidase                                                                                         |                                                                                                          |
| 1183                        | Niobioflavin biosynthesis protein RibD                                                                      | also in other plantarum genomes; WCFS1 is known to have a disrupted riboflavin biosynthesis gene cluster |
| 1488-1489                   | Niacin transporter NiaP; Quinolate phosphoribosyltransferase [decarboxylating]                              | highest identity to <i>L. helveticus</i>                                                                 |
| <b>On putative plasmids</b> |                                                                                                             |                                                                                                          |
| 3400-3409                   | Arabinose efflux permease; Polysaccharide pyruvyl transferase; sugar/inositol transporter; Pyruvate oxidase |                                                                                                          |
| 3064-3066                   | Trehalose 6-phosphate phosphorylase; Beta-phosphoglucomutase; HAD superfamily hydrolase                     |                                                                                                          |
| 3067-3071                   | Multicopper oxidase CueO; multidrug transporter                                                             |                                                                                                          |
| 3077-3086                   | Manganese transport protein MntH and regulator MntR; Kup system potassium uptake protein                    | MntH is present on chromosome of WCFS1                                                                   |
| 3087-3092                   | Polar amino acid ABC transporter                                                                            |                                                                                                          |



**Table S7B.** Summary of main unique contigs/gene clusters/genes absent in both *L. plantarum* CIP104448 and *L. plantarum* TIFN101

| OGs                 | Contains functions                                                                                                              | Comment                                                                                                                           |
|---------------------|---------------------------------------------------------------------------------------------------------------------------------|-----------------------------------------------------------------------------------------------------------------------------------|
| <b>Chromosome</b>   |                                                                                                                                 |                                                                                                                                   |
| 201-208             | Sugar PTS system                                                                                                                |                                                                                                                                   |
| 349-361             | Plantaricin biosynthesis                                                                                                        | CIP48 lacks the entire plantaricin gene cluster, while TIFN101 lacks plnRLKJMNO PQ genes                                          |
| 971-990<br>998-1026 | EPS biosynthesis                                                                                                                | CIP48 lacks the entire cps-cps2-cps3 biosynthesis cluster, whereas TIFN101 only has 3 genes (which could be on a plasmid instead) |
| 2075-2081           | Formate metabolism; regulators                                                                                                  |                                                                                                                                   |
| 2113-2117           | PTS system, N-acetylglucosamine-specific                                                                                        |                                                                                                                                   |
| 2419-2430           | Oxidoreductases                                                                                                                 |                                                                                                                                   |
| 2485-2500           | iron chelatin ABC transporter; oxidoreductases; mucus-binding protein, LPXTG-anchored; cell surface complex CscABC              |                                                                                                                                   |
| 2508                | Mucus-binding protein, LPXTG-anchored                                                                                           |                                                                                                                                   |
| 2520-2529           | PTS system, beta-glucosides-specific; transketolase; sugar permease                                                             |                                                                                                                                   |
| 2539-2548           | Bile acid 7-alpha-dehydratase; oxidoreductase; transporter                                                                      |                                                                                                                                   |
| 2603-2607           | PTS system, beta-glucosides-specific                                                                                            |                                                                                                                                   |
| 2828-2846           | Sugar PTS systems                                                                                                               |                                                                                                                                   |
| 2863-2869           | Arabinose uptake and metabolism                                                                                                 |                                                                                                                                   |
| 2892-2893           | Auto-inducing peptide (AIP) and its export/modification                                                                         |                                                                                                                                   |
| 2899-2953           | Many sugar utilization gene cassettes (rhamnose, galactitol, myo-inositol, glucitol/sorbitol, mannose-related oligosaccharides) |                                                                                                                                   |
